# Supplementary material
Source: JCI journal article supplement (doi:10.1172/jci183935)
Supplement: sd1 [file 1]

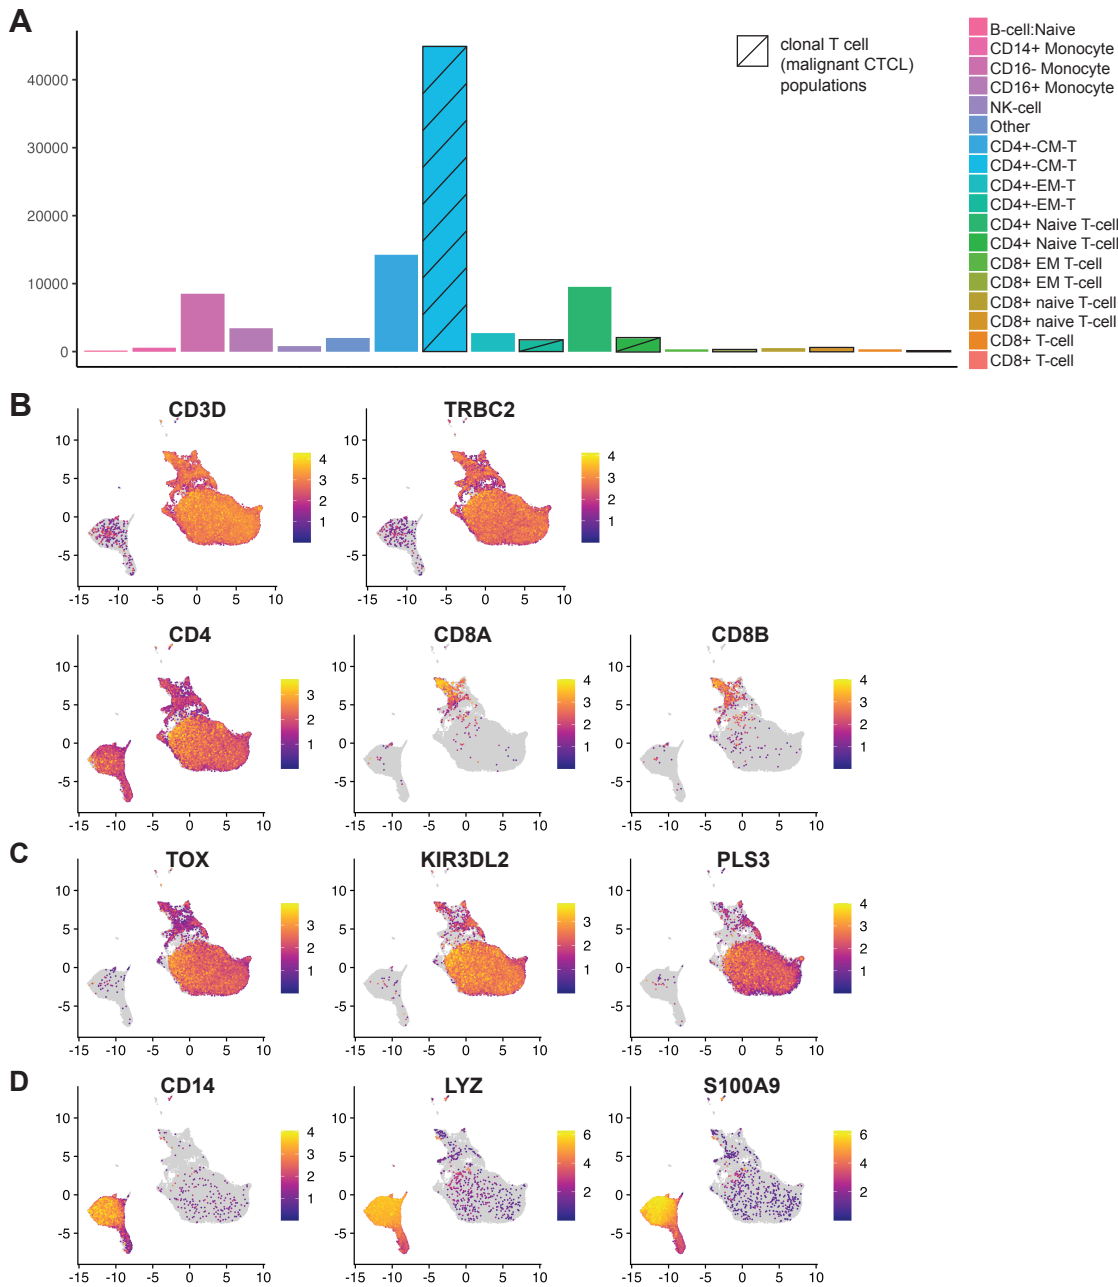

**Supplementary Figure 1. scRNAseq cell type distribution and canonical marker genes demonstrates separation of benign and malignant T cells.**

(A) Distribution of cell types based on HPCA cell annotation analysis for 92,496 mononuclear cells from 16 PBMC samples from 6 CTCL patients. (B-D) UMAP projection all cells from (A) shows expression of selected canonical T-cell (B), CTCL (C), and myeloid (D) genes.

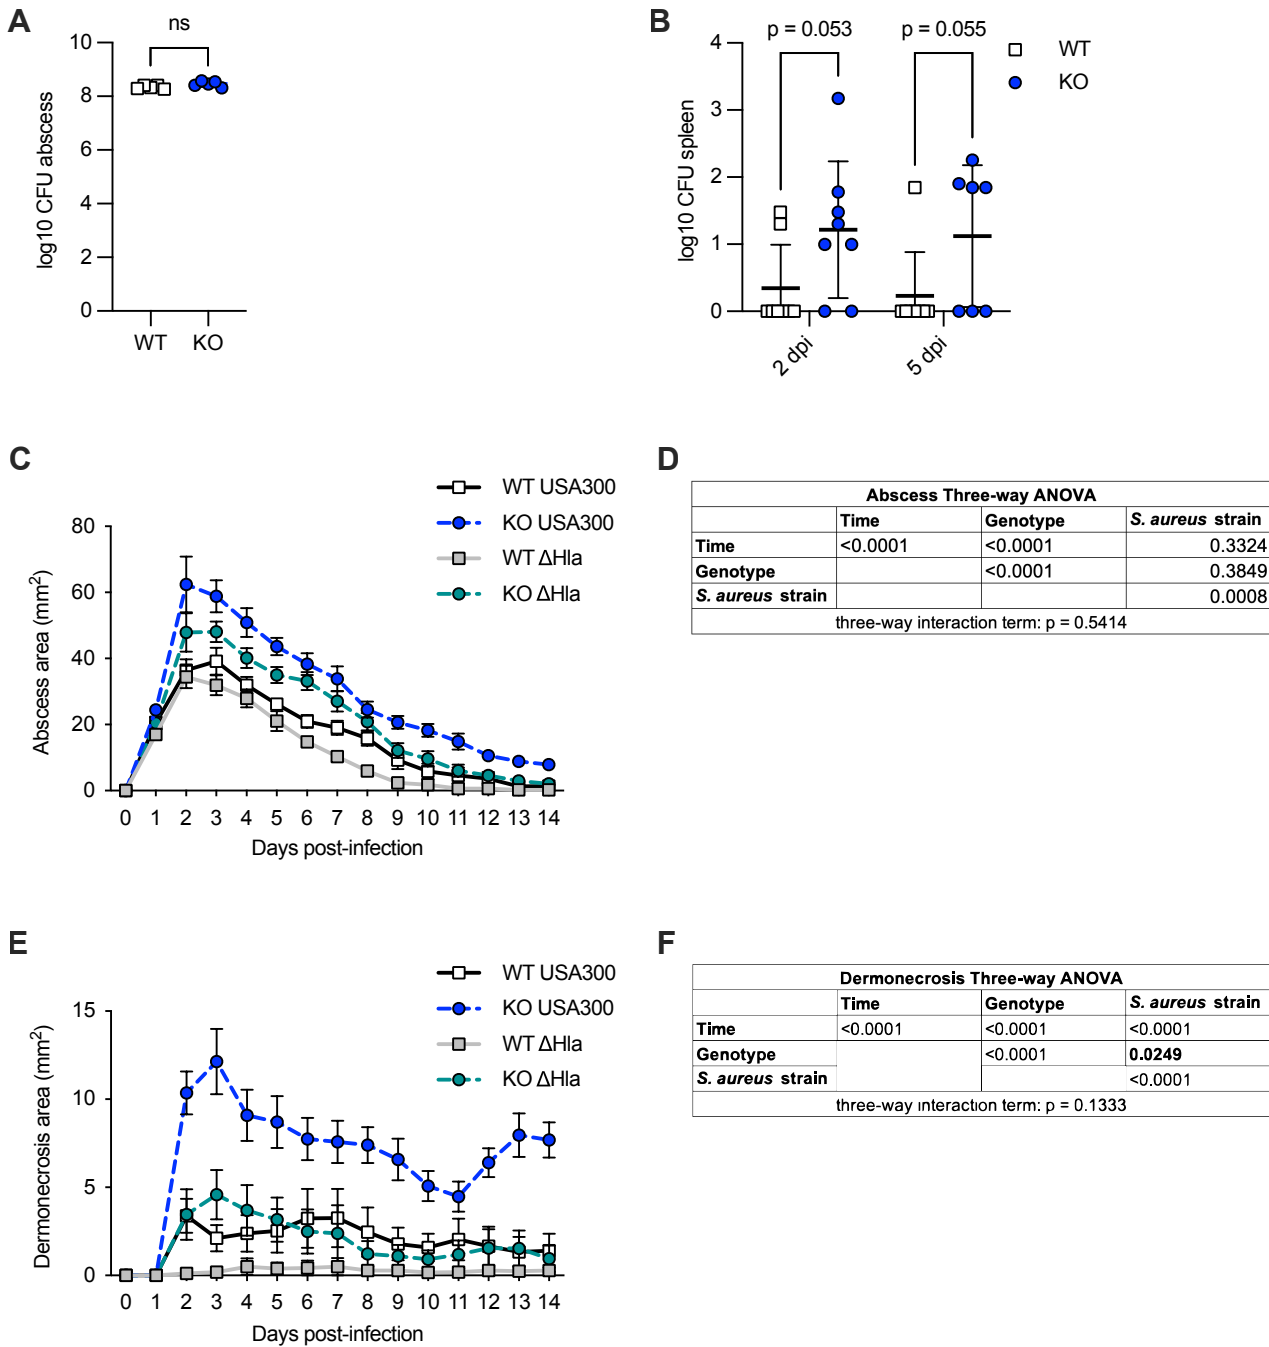

**Supplementary Figure 2. Increase in abscess and dermonecrosis size in *S. aureus* skin infection in *Lair1* KO is maintained in the absence of Hla.**

(A-B) WT and *Lair1* KO mice were infected subcutaneously with  $1 \times 10^7$  CFU *S. aureus* USA300 LAC. Bacterial growth was quantified as CFU recovered from homogenized skin punch biopsies collected at 2 days post-infection (dpi) (A) and from spleen at 2 dpi and 5 dpi (B). Statistical analysis for panels (A-B) by unpaired t-test. Significance: ns, not significant. (C-F) WT and *Lair1* KO mice were infected on opposite flanks with USA300/LAC and isogenic Hla knock-out strain ( $\Delta$ Hla), then lesion size measured over 14 days. Abscess area is plotted over 14 days (C) and shown with corresponding hypothesis testing (D) shown above; dermonecrosis area is plotted over 14 days (E) and shown with corresponding hypothesis testing (F). Three-way ANOVA tables show p-values for single variable effects shown on the diagonal, two-way interaction effects shown between respective variables, and three-way interaction effect specified below (D, F), with significant interaction terms involving genotype bolded.

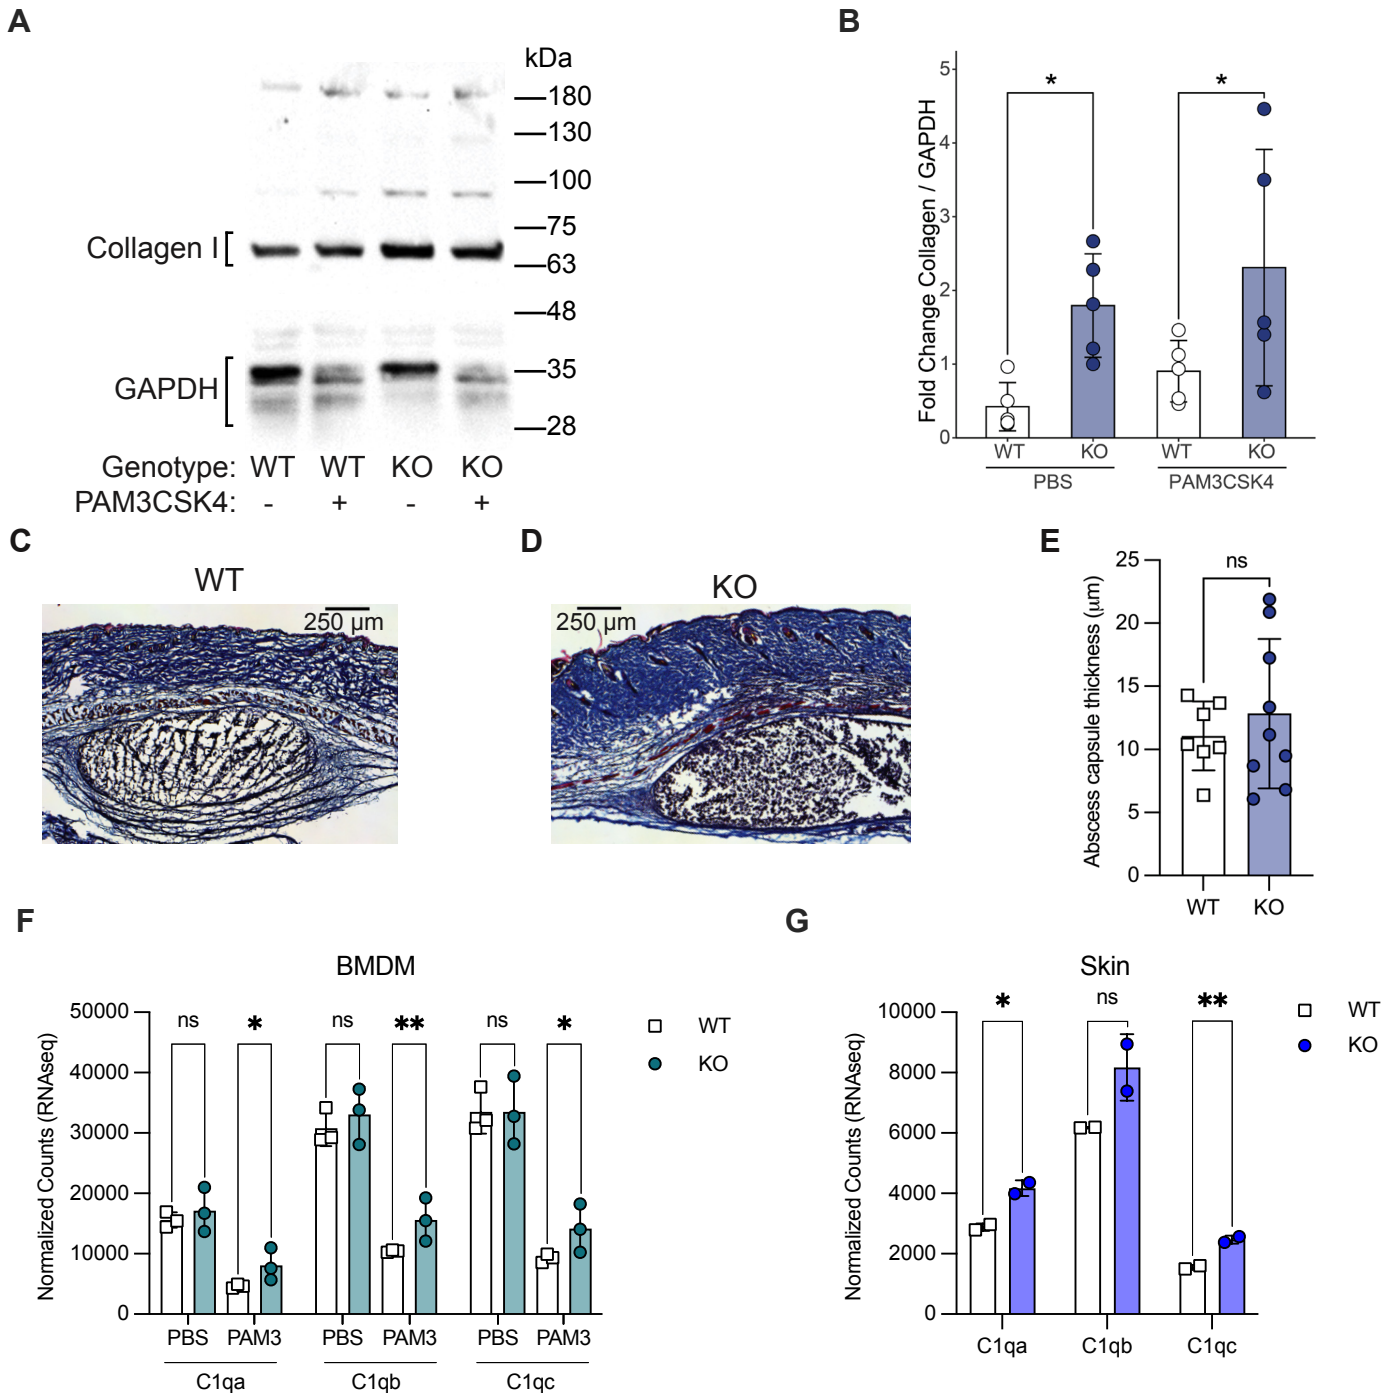

**Supplementary Figure 3. Higher collagen protein and complement C1q expression in *Lair1* KO *S. aureus*-infected skin abscess and macrophages.**

(A) Western blot demonstrating representative Collagen I and GAPDH staining from BMDMs treated with PBS or PAM3CSK4. (B) Quantification of Western blot band intensity in WT and KO BMDMs representative of 3 independent experiments. Statistical analysis by two-way ANOVA with multiple t-tests. Significance: \*,  $p < 0.05$ . (C-D) Example images from trichrome stained SSTI skin lesions at 1 dpi from WT (C) and *Lair1* KO (D) are shown, with abscess marked with an asterisk (dermonecrosis not yet developed at 1 dpi), as well as average capsule thickness at 3 points per lesion, measured in 4 WT and 5 KO lesions across multiple sections (E). Statistical analysis by unpaired t-test. Significance: ns, not significant. (F-G) Normalized gene counts (RNAseq) for *C1qa*, *C1qb*, and *C1qc* in WT and *Lair1* KO BMDMs stimulated with PBS or PAM3CSK4 (PAM3) (F) and in *S. aureus*-infected skin (G). Statistical analysis for panels (F-G) by DESeq2 adjusted p-value. Significance: ns, not significant; \*,  $p < 0.05$ ; \*\*,  $p < 0.01$ .

**A**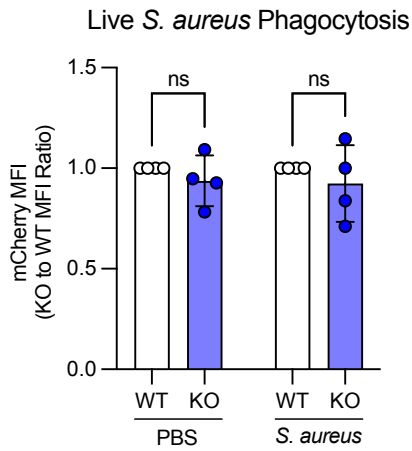**B**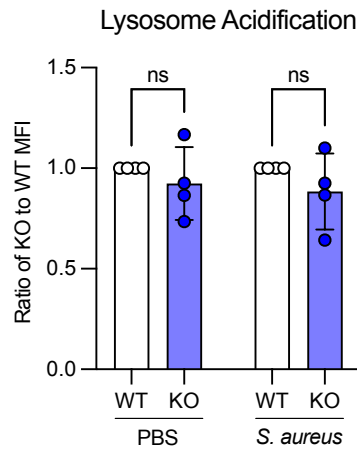

**Supplementary Figure 4. *Lair1* KO and WT monocytes exhibit equivalent phagocytosis of *S. aureus*.** Classical monocytes were isolated from WT and *Lair1* KO bone marrow. **(A)** Monocytes were incubated for 30 minutes with PBS or mCherry-expressing *S. aureus* at MOI 50:1 and subjected to flow cytometry. mCherry MFI is shown as a ratio of KO to WT fluorescence. **(B)** Ratio of WT to KO lysosome probe MFI measured by flow cytometry indicates lysosome acidification in monocytes treated with PBS or *S. aureus* at MOI 100:1 for 30 minutes. Statistical analysis by two-way ANOVA with Fisher's LSD. Significance: ns, not significant

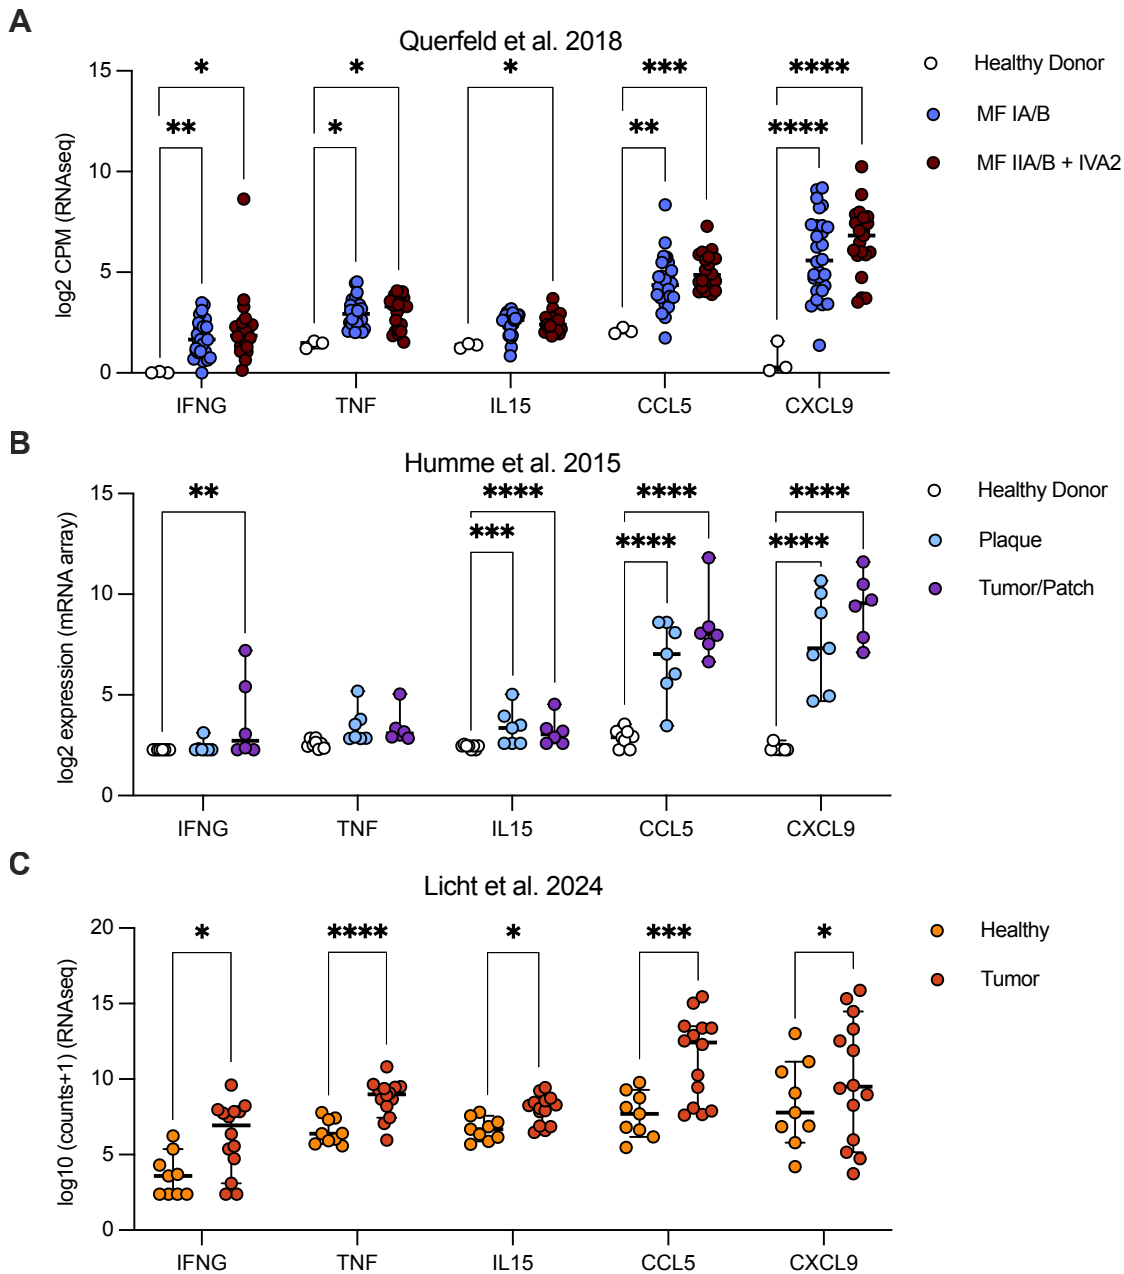

**Supplementary Figure 5. Some cytokines elevated in CTCL are not elevated in *Lair1* KO.**

Publicly available CTCL skin biopsy RNA-seq from Querfeld et al. 2018 (7) (A), Humme et al. 2013 (48) (B), and Licht et al. 2024 (49) (C) were analyzed using DESeq2. Normalized expression for IFNG, TNF, IL15, CCL5, and CXCL9 is shown. Statistical analysis for all panels by DESeq adjusted p-value. Significance: \*,  $p < 0.05$ ; \*\*,  $p < 0.01$ ; \*\*\*,  $p < 0.001$ ; \*\*\*\*,  $p < 0.0001$ .

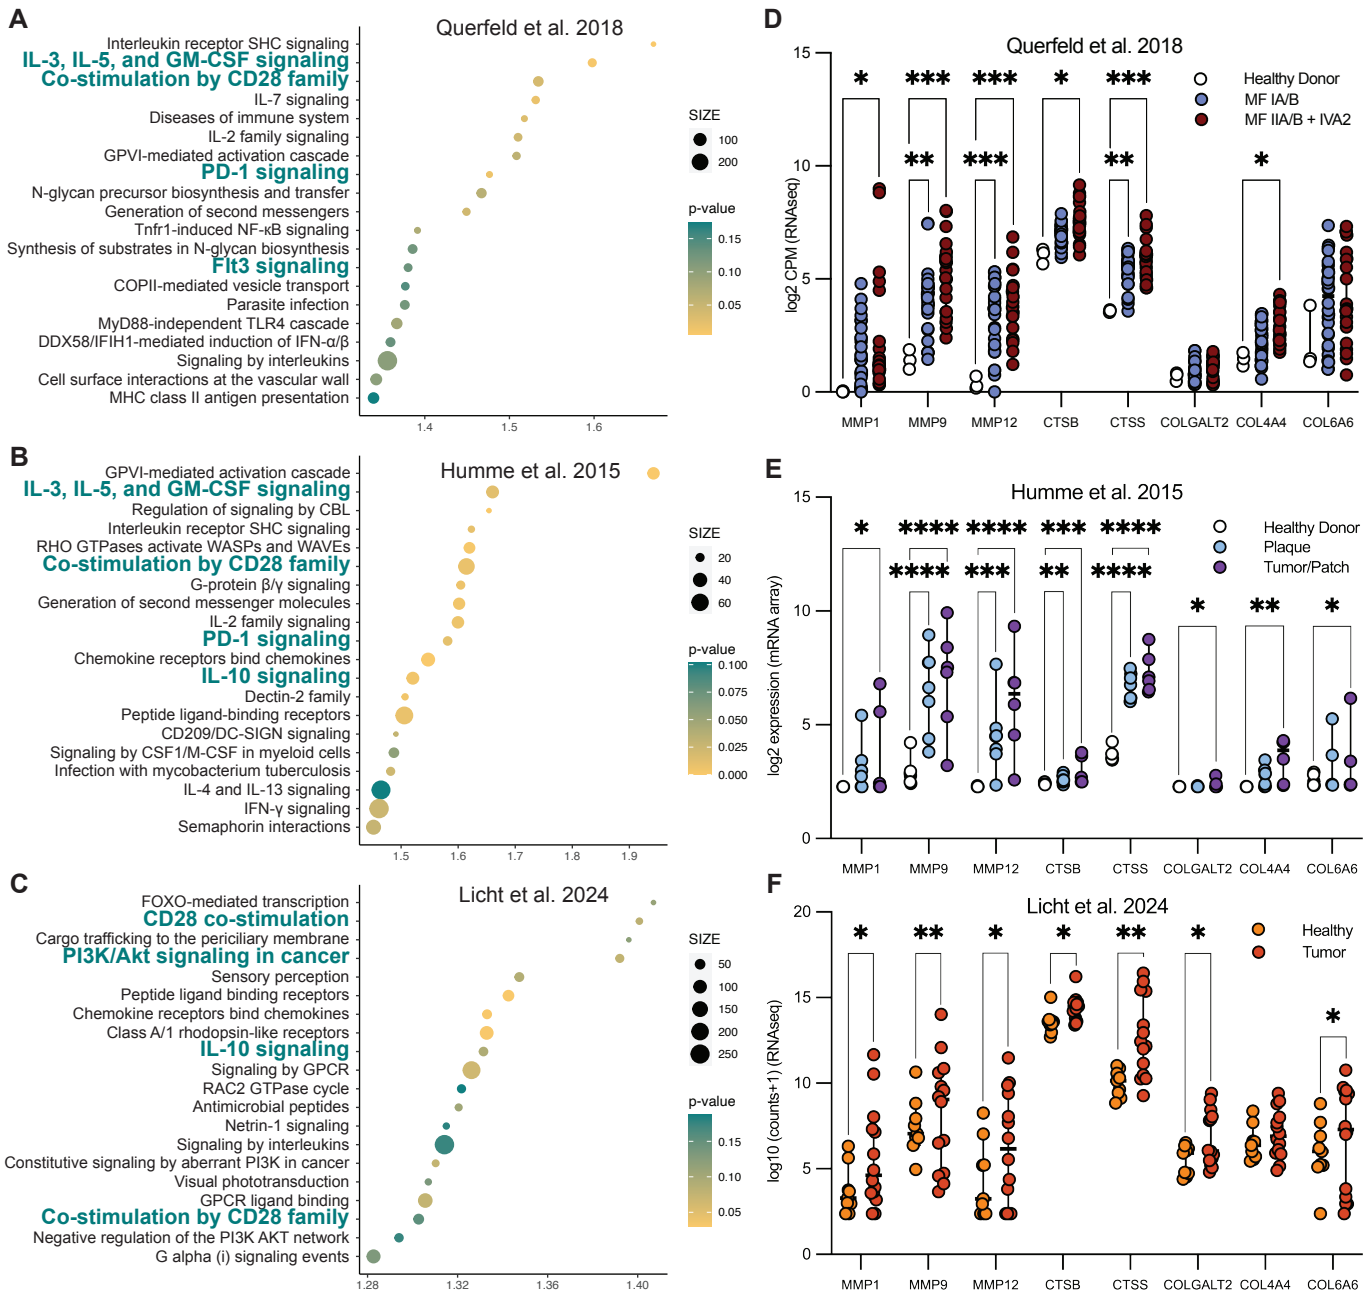

### Supplementary Figure 6. Several collagen and ECM remodeling genes are elevated in CTCL.

Publicly available CTCL skin biopsy RNA-seq from Querfeld et al. 2018 (7) (A, D), Humme et al. 2013 (48) (B, E), and Licht et al. 2024 (49) (C, F) were analyzed using DESeq2 and GSEA. (A-C) Top twenty pathways elevated in CTCL by GSEA human reactome analysis are shown with GSEA-defined enrichment scores and nominal p-value. (D-F) Normalized expression is shown for collagen pathway genes significantly increased in at least two datasets, including *MMP1*, *MMP9*, *MMP12*, *CTSB*, *CTSS*, *COLGALT2*, *COL4A4*, and *COL6A6*. Statistical analysis for panels (D-F) by DESeq adjusted p-value. Significance: \*,  $p < 0.05$ ; \*\*,  $p < 0.01$ ; \*\*\*,  $p < 0.001$ ; \*\*\*\*,  $p < 0.0001$ .
